# Supplementary material for: Optimizing Fatigue Performance in Gradient Structural Steels by Manipulating Grain Size Gradient Rate
Source: Preprints.org preprint supplement (doi:10.20944/preprints202405.1947.v1), 2024-05-29
Supplement: Supplementary file 1 [file supplementary]

## Supplementary Materials

### Optimizing Fatigue Performance in Gradient Structural Steels by Manipulating Grain Size Gradient Rate

Meichen Pan, Xin Chen, Meiling He, Yi Kong, Yong Du, Alexander Hartmaier, Xiaoyu Zheng, and Yuling Liu

**Table S1. Engineering stress-strain data for three-types of gradient rate models**

| Gradient number  | 1      |             | 2      |             | 3      |             |        |
|------------------|--------|-------------|--------|-------------|--------|-------------|--------|
|                  | Strain | Stress(MPa) | Strain | Stress(MPa) | Strain | Stress(MPa) | Strain |
| A (Convex type)  | 0.000  | 0.000       | 0.000  | 0.000       | 0.000  | 0.000       | 0.000  |
|                  | 0.003  | 690.000     | 0.003  | 690.892     | 0.003  | 692.505     | 0.003  |
|                  | 0.010  | 697.350     | 0.010  | 698.242     | 0.010  | 699.855     | 0.010  |
|                  | 0.020  | 711.810     | 0.020  | 712.702     | 0.020  | 714.315     | 0.020  |
|                  | 0.030  | 725.910     | 0.030  | 726.802     | 0.030  | 728.415     | 0.030  |
|                  | 0.050  | 733.340     | 0.050  | 734.232     | 0.050  | 735.845     | 0.050  |
|                  | 0.070  | 733.850     | 0.070  | 734.742     | 0.070  | 736.355     | 0.070  |
|                  | 0.090  | 734.450     | 0.090  | 735.342     | 0.090  | 736.955     | 0.090  |
|                  | 0.110  | 732.950     | 0.110  | 733.842     | 0.110  | 735.455     | 0.110  |
|                  | 0.130  | 706.230     | 0.130  | 707.122     | 0.130  | 708.735     | 0.130  |
|                  | 0.154  | 620.810     | 0.154  | 621.702     | 0.154  | 623.315     | 0.154  |
| B (Linear type)  | Strain | Stress(MPa) | Strain | Stress(MPa) | Strain | Stress(MPa) | Strain |
|                  | 0.000  | 0.000       | 0.000  | 0.000       | 0.000  | 0.000       | 0.000  |
|                  | 0.003  | 690.000     | 0.003  | 696.869     | 0.003  | 704.657     | 0.003  |
|                  | 0.010  | 697.350     | 0.010  | 704.219     | 0.010  | 712.007     | 0.010  |
|                  | 0.020  | 711.810     | 0.020  | 718.679     | 0.020  | 726.467     | 0.020  |
|                  | 0.030  | 725.910     | 0.030  | 732.779     | 0.030  | 740.567     | 0.030  |
|                  | 0.050  | 733.340     | 0.050  | 740.209     | 0.050  | 747.997     | 0.050  |
|                  | 0.070  | 733.850     | 0.070  | 740.719     | 0.070  | 748.507     | 0.070  |
|                  | 0.090  | 734.450     | 0.090  | 741.319     | 0.090  | 749.107     | 0.090  |
|                  | 0.110  | 732.950     | 0.110  | 739.819     | 0.110  | 747.607     | 0.110  |
|                  | 0.130  | 706.230     | 0.130  | 713.099     | 0.130  | 720.887     | 0.130  |
|                  | 0.154  | 620.810     | 0.154  | 627.679     | 0.154  | 635.467     | 0.154  |
| C (Concave type) | Strain | Stress(MPa) | Strain | Stress(MPa) | Strain | Stress(MPa) | Strain |
|                  | 0.000  | 0.000       | 0.000  | 0.000       | 0.000  | 0.000       | 0.000  |
|                  | 0.003  | 690.000     | 0.003  | 707.089     | 0.004  | 731.153     | 0.004  |
|                  | 0.010  | 697.350     | 0.010  | 714.439     | 0.010  | 738.503     | 0.010  |
|                  | 0.020  | 711.810     | 0.020  | 728.899     | 0.020  | 752.963     | 0.020  |
|                  | 0.030  | 725.910     | 0.030  | 742.999     | 0.030  | 767.063     | 0.030  |
|                  | 0.050  | 733.340     | 0.050  | 750.429     | 0.050  | 774.493     | 0.050  |
|                  | 0.070  | 733.850     | 0.070  | 750.939     | 0.070  | 775.003     | 0.070  |
|                  | 0.090  | 734.450     | 0.090  | 751.539     | 0.090  | 775.603     | 0.090  |
|                  | 0.110  | 732.950     | 0.110  | 750.039     | 0.110  | 774.103     | 0.110  |
|                  | 0.130  | 706.230     | 0.130  | 723.319     | 0.130  | 747.383     | 0.130  |
|                  | 0.154  | 620.810     | 0.154  | 637.899     | 0.154  | 661.963     | 0.154  |

| 4           |        | 5           |        | 6           |        | 7           |        |
|-------------|--------|-------------|--------|-------------|--------|-------------|--------|
| Stress(MPa) | Strain | Stress(MPa) | Strain | Stress(MPa) | Strain | Stress(MPa) | Strain |
| 0.000       | 0.000  | 0.000       | 0.000  | 0.000       | 0.000  | 0.000       | 0.000  |
| 694.096     | 0.003  | 696.747     | 0.003  | 701.702     | 0.003  | 710.375     | 0.004  |
| 701.446     | 0.010  | 704.097     | 0.010  | 709.052     | 0.010  | 717.725     | 0.010  |
| 715.906     | 0.020  | 718.557     | 0.020  | 723.512     | 0.020  | 732.185     | 0.020  |
| 730.006     | 0.030  | 732.657     | 0.030  | 737.612     | 0.030  | 746.285     | 0.030  |
| 737.436     | 0.050  | 740.087     | 0.050  | 745.042     | 0.050  | 753.715     | 0.050  |
| 737.946     | 0.070  | 740.597     | 0.070  | 745.552     | 0.070  | 754.225     | 0.070  |
| 738.546     | 0.090  | 741.197     | 0.090  | 746.152     | 0.090  | 754.825     | 0.090  |
| 737.046     | 0.110  | 739.697     | 0.110  | 744.652     | 0.110  | 753.325     | 0.110  |
| 710.326     | 0.130  | 712.977     | 0.130  | 717.932     | 0.130  | 726.605     | 0.130  |
| 624.906     | 0.154  | 627.557     | 0.154  | 632.512     | 0.154  | 641.185     | 0.154  |
| Stress(MPa) | Strain | Stress(MPa) | Strain | Stress(MPa) | Strain | Stress(MPa) | Strain |
| 0.000       | 0.000  | 0.000       | 0.000  | 0.000       | 0.000  | 0.000       | 0.000  |
| 713.874     | 0.004  | 724.942     | 0.004  | 738.069     | 0.004  | 755.303     | 0.004  |
| 721.224     | 0.010  | 732.292     | 0.010  | 745.419     | 0.010  | 762.653     | 0.010  |
| 735.684     | 0.020  | 746.752     | 0.020  | 759.879     | 0.020  | 777.113     | 0.020  |
| 749.784     | 0.030  | 760.852     | 0.030  | 773.979     | 0.030  | 791.213     | 0.030  |
| 757.214     | 0.050  | 768.282     | 0.050  | 781.409     | 0.050  | 798.643     | 0.050  |
| 757.724     | 0.070  | 768.792     | 0.070  | 781.919     | 0.070  | 799.153     | 0.070  |
| 758.324     | 0.090  | 769.392     | 0.090  | 782.519     | 0.090  | 799.753     | 0.090  |
| 756.824     | 0.110  | 767.892     | 0.110  | 781.019     | 0.110  | 798.253     | 0.110  |
| 730.104     | 0.130  | 741.172     | 0.130  | 754.299     | 0.130  | 771.533     | 0.130  |
| 644.684     | 0.154  | 655.752     | 0.154  | 668.879     | 0.154  | 686.113     | 0.154  |
| Stress(MPa) | Strain | Stress(MPa) | Strain | Stress(MPa) | Strain | Stress(MPa) | Strain |
| 0.000       | 0.000  | 0.000       | 0.000  | 0.000       | 0.000  | 0.000       | 0.000  |
| 759.749     | 0.004  | 798.774     | 0.004  | 829.186     | 0.004  | 845.732     | 0.004  |
| 767.099     | 0.010  | 806.124     | 0.010  | 836.536     | 0.010  | 853.082     | 0.010  |
| 781.559     | 0.020  | 820.584     | 0.020  | 850.996     | 0.020  | 867.542     | 0.020  |
| 795.659     | 0.030  | 834.684     | 0.030  | 865.096     | 0.030  | 881.642     | 0.030  |
| 803.089     | 0.050  | 842.114     | 0.050  | 872.526     | 0.050  | 889.072     | 0.050  |
| 803.599     | 0.070  | 842.624     | 0.070  | 873.036     | 0.070  | 889.582     | 0.070  |
| 804.199     | 0.090  | 843.224     | 0.090  | 873.636     | 0.090  | 890.182     | 0.090  |
| 802.699     | 0.110  | 841.724     | 0.110  | 872.136     | 0.110  | 888.682     | 0.110  |
| 775.979     | 0.130  | 815.004     | 0.130  | 845.416     | 0.130  | 861.962     | 0.130  |
| 690.559     | 0.154  | 729.584     | 0.154  | 759.996     | 0.154  | 776.542     | 0.154  |

| 8           |        | 9           |        | 10          |  |
|-------------|--------|-------------|--------|-------------|--|
| Stress(MPa) | Strain | Stress(MPa) | Strain | Stress(MPa) |  |
| 0.000       | 0.000  | 0.000       | 0.000  | 0.000       |  |
| 726.674     | 0.004  | 758.698     | 0.004  | 864.807     |  |
| 734.024     | 0.010  | 766.048     | 0.010  | 872.157     |  |
| 748.484     | 0.020  | 780.508     | 0.020  | 886.617     |  |
| 762.584     | 0.030  | 794.608     | 0.030  | 900.717     |  |
| 770.014     | 0.050  | 802.038     | 0.050  | 908.147     |  |
| 770.524     | 0.070  | 802.548     | 0.070  | 908.657     |  |
| 771.124     | 0.090  | 803.148     | 0.090  | 909.257     |  |
| 769.624     | 0.110  | 801.648     | 0.110  | 907.757     |  |
| 742.904     | 0.130  | 774.928     | 0.130  | 881.037     |  |
| 657.484     | 0.154  | 689.508     | 0.154  | 795.617     |  |
| Stress(MPa) | Strain | Stress(MPa) | Strain | Stress(MPa) |  |
| 0.000       | 0.000  | 0.000       | 0.000  | 0.000       |  |
| 778.297     | 0.004  | 809.844     | 0.004  | 864.807     |  |
| 785.647     | 0.010  | 817.194     | 0.010  | 872.157     |  |
| 800.107     | 0.020  | 831.654     | 0.020  | 886.617     |  |
| 814.207     | 0.030  | 845.754     | 0.030  | 900.717     |  |
| 821.637     | 0.050  | 853.184     | 0.050  | 908.147     |  |
| 822.147     | 0.070  | 853.694     | 0.070  | 908.657     |  |
| 822.747     | 0.090  | 854.294     | 0.090  | 909.257     |  |
| 821.247     | 0.110  | 852.794     | 0.110  | 907.757     |  |
| 794.527     | 0.130  | 826.074     | 0.130  | 881.037     |  |
| 709.107     | 0.154  | 740.654     | 0.154  | 795.617     |  |
| Stress(MPa) | Strain | Stress(MPa) | Strain | Stress(MPa) |  |
| 0.000       | 0.000  | 0.000       | 0.000  | 0.000       |  |
| 855.365     | 0.004  | 861.691     | 0.004  | 864.807     |  |
| 862.715     | 0.010  | 869.041     | 0.010  | 872.157     |  |
| 877.175     | 0.020  | 883.501     | 0.020  | 886.617     |  |
| 891.275     | 0.030  | 897.601     | 0.030  | 900.717     |  |
| 898.705     | 0.050  | 905.031     | 0.050  | 908.147     |  |
| 899.215     | 0.070  | 905.541     | 0.070  | 908.657     |  |
| 899.815     | 0.090  | 906.141     | 0.090  | 909.257     |  |
| 898.315     | 0.110  | 904.641     | 0.110  | 907.757     |  |
| 871.595     | 0.130  | 877.921     | 0.130  | 881.037     |  |
| 786.175     | 0.154  | 792.501     | 0.154  | 795.617     |  |

**Table S2. True stress-strain data for three-types of gradient rate models**

| Gradient number  | 1      |             | 2      |             | 3      |             |
|------------------|--------|-------------|--------|-------------|--------|-------------|
|                  | Strain | Stress(MPa) | Strain | Stress(MPa) | Strain | Stress(MPa) |
| A (Convex type)  | 0.000  | 0.000       | 0.000  | 0.000       | 0.000  | 0.000       |
|                  | 0.003  | 692.070     | 0.003  | 692.965     | 0.003  | 694.583     |
|                  | 0.010  | 704.324     | 0.010  | 705.224     | 0.010  | 706.854     |
|                  | 0.020  | 726.046     | 0.020  | 726.956     | 0.020  | 728.601     |
|                  | 0.030  | 747.687     | 0.030  | 748.606     | 0.030  | 750.267     |
|                  | 0.049  | 770.007     | 0.049  | 770.944     | 0.049  | 772.637     |
|                  | 0.068  | 785.220     | 0.068  | 786.174     | 0.068  | 787.900     |
|                  | 0.086  | 800.551     | 0.086  | 801.523     | 0.086  | 803.281     |
| B (Linear type)  | Strain | Stress(MPa) | Strain | Stress(MPa) | Strain | Stress(MPa) |
|                  | 0.000  | 0.000       | 0.000  | 0.000       | 0.000  | 0.000       |
|                  | 0.003  | 692.070     | 0.003  | 698.960     | 0.003  | 706.771     |
|                  | 0.010  | 704.324     | 0.010  | 711.261     | 0.010  | 719.127     |
|                  | 0.020  | 726.046     | 0.020  | 733.053     | 0.020  | 740.996     |
|                  | 0.030  | 747.687     | 0.030  | 754.762     | 0.030  | 762.784     |
|                  | 0.049  | 770.007     | 0.049  | 777.219     | 0.049  | 785.397     |
|                  | 0.068  | 785.220     | 0.068  | 792.569     | 0.068  | 800.902     |
| C (Concave type) | 0.086  | 800.551     | 0.086  | 808.038     | 0.086  | 816.527     |
|                  | Strain | Stress(MPa) | Strain | Stress(MPa) | Strain | Stress(MPa) |
|                  | 0.000  | 0.000       | 0.000  | 0.000       | 0.000  | 0.000       |
|                  | 0.003  | 692.070     | 0.003  | 709.210     | 0.004  | 734.078     |
|                  | 0.010  | 704.324     | 0.010  | 721.583     | 0.010  | 745.888     |
|                  | 0.020  | 726.046     | 0.020  | 743.477     | 0.020  | 768.022     |
|                  | 0.030  | 747.687     | 0.030  | 765.289     | 0.030  | 790.075     |
|                  | 0.049  | 770.007     | 0.049  | 787.950     | 0.049  | 813.218     |
|                  | 0.068  | 785.220     | 0.068  | 803.505     | 0.068  | 829.253     |
|                  | 0.086  | 800.551     | 0.086  | 819.178     | 0.086  | 845.407     |

| 4      |             | 5      |             | 6      |             | 7      |             |
|--------|-------------|--------|-------------|--------|-------------|--------|-------------|
| Strain | Stress(MPa) | Strain | Stress(MPa) | Strain | Stress(MPa) | Strain | Stress(MPa) |
| 0.000  | 0.000       | 0.000  | 0.000       | 0.000  | 0.000       | 0.000  | 0.000       |
| 0.003  | 696.178     | 0.003  | 698.837     | 0.003  | 703.807     | 0.003  | 712.506     |
| 0.010  | 708.460     | 0.010  | 711.138     | 0.010  | 716.143     | 0.010  | 724.902     |
| 0.020  | 730.224     | 0.020  | 732.928     | 0.020  | 737.982     | 0.020  | 746.829     |
| 0.030  | 751.906     | 0.030  | 754.637     | 0.030  | 759.740     | 0.030  | 768.674     |
| 0.049  | 774.308     | 0.049  | 777.091     | 0.049  | 782.294     | 0.049  | 791.401     |
| 0.068  | 789.602     | 0.068  | 792.439     | 0.068  | 797.741     | 0.068  | 807.021     |
| 0.086  | 805.015     | 0.086  | 807.905     | 0.086  | 813.306     | 0.086  | 822.759     |
| Strain | Stress(MPa) | Strain | Stress(MPa) | Strain | Stress(MPa) | Strain | Stress(MPa) |
| 0.000  | 0.000       | 0.000  | 0.000       | 0.000  | 0.000       | 0.000  | 0.000       |
| 0.003  | 716.016     | 0.004  | 727.842     | 0.004  | 741.021     | 0.004  | 758.324     |
| 0.010  | 728.436     | 0.010  | 739.615     | 0.010  | 752.873     | 0.010  | 770.280     |
| 0.020  | 750.398     | 0.020  | 761.687     | 0.020  | 775.077     | 0.020  | 792.655     |
| 0.030  | 772.278     | 0.030  | 783.678     | 0.030  | 797.198     | 0.030  | 814.949     |
| 0.049  | 795.075     | 0.049  | 806.696     | 0.049  | 820.479     | 0.049  | 838.575     |
| 0.068  | 810.765     | 0.068  | 822.607     | 0.068  | 836.653     | 0.068  | 855.094     |
| 0.086  | 826.573     | 0.086  | 838.637     | 0.086  | 852.946     | 0.086  | 871.731     |
| Strain | Stress(MPa) | Strain | Stress(MPa) | Strain | Stress(MPa) | Strain | Stress(MPa) |
| 0.000  | 0.000       | 0.000  | 0.000       | 0.000  | 0.000       | 0.000  | 0.000       |
| 0.004  | 762.788     | 0.004  | 801.969     | 0.004  | 832.503     | 0.004  | 849.115     |
| 0.010  | 774.770     | 0.010  | 814.185     | 0.010  | 844.901     | 0.010  | 861.613     |
| 0.020  | 797.190     | 0.020  | 836.996     | 0.020  | 868.016     | 0.020  | 884.893     |
| 0.030  | 819.529     | 0.030  | 859.725     | 0.030  | 891.049     | 0.030  | 908.091     |
| 0.049  | 843.243     | 0.049  | 884.220     | 0.049  | 916.152     | 0.049  | 933.526     |
| 0.068  | 859.851     | 0.068  | 901.608     | 0.068  | 934.149     | 0.068  | 951.853     |
| 0.086  | 876.577     | 0.086  | 919.114     | 0.086  | 952.263     | 0.086  | 970.298     |

| 8      |             | 9      |             | 10     |             |
|--------|-------------|--------|-------------|--------|-------------|
| Strain | Stress(MPa) | Strain | Stress(MPa) | Strain | Stress(MPa) |
| 0.000  | 0.000       | 0.000  | 0.000       | 0.000  | 0.000       |
| 0.004  | 729.581     | 0.004  | 761.733     | 0.004  | 868.266     |
| 0.010  | 741.364     | 0.010  | 773.708     | 0.010  | 880.879     |
| 0.020  | 763.454     | 0.020  | 796.118     | 0.020  | 904.349     |
| 0.030  | 785.462     | 0.030  | 818.446     | 0.030  | 927.739     |
| 0.049  | 808.515     | 0.049  | 842.140     | 0.049  | 953.554     |
| 0.068  | 824.461     | 0.068  | 858.726     | 0.068  | 972.263     |
| 0.086  | 840.525     | 0.086  | 875.431     | 0.086  | 991.090     |
| Strain | Stress(MPa) | Strain | Stress(MPa) | Strain | Stress(MPa) |
| 0.000  | 0.000       | 0.000  | 0.000       | 0.000  | 0.000       |
| 0.004  | 781.410     | 0.004  | 813.083     | 0.004  | 868.266     |
| 0.010  | 793.503     | 0.010  | 825.366     | 0.010  | 880.879     |
| 0.020  | 816.109     | 0.020  | 848.287     | 0.020  | 904.349     |
| 0.030  | 838.633     | 0.030  | 871.127     | 0.030  | 927.739     |
| 0.049  | 862.719     | 0.049  | 895.843     | 0.049  | 953.554     |
| 0.068  | 879.697     | 0.068  | 913.453     | 0.068  | 972.263     |
| 0.086  | 896.794     | 0.086  | 931.180     | 0.086  | 991.090     |
| Strain | Stress(MPa) | Strain | Stress(MPa) | Strain | Stress(MPa) |
| 0.000  | 0.000       | 0.000  | 0.000       | 0.000  | 0.000       |
| 0.004  | 858.786     | 0.004  | 865.138     | 0.004  | 868.266     |
| 0.010  | 871.342     | 0.010  | 877.731     | 0.010  | 880.879     |
| 0.020  | 894.719     | 0.020  | 901.171     | 0.020  | 904.349     |
| 0.030  | 918.013     | 0.030  | 924.529     | 0.030  | 927.739     |
| 0.049  | 943.640     | 0.049  | 950.283     | 0.049  | 953.554     |
| 0.068  | 962.160     | 0.068  | 968.929     | 0.068  | 972.263     |
| 0.086  | 980.798     | 0.086  | 987.694     | 0.086  | 991.090     |

**Table S3. The ductile damage parameters for three-types of gradient rate models**

| <b>Gradient number</b> |                       | <b>1</b> | <b>2</b> | <b>3</b> | <b>4</b> | <b>5</b> |
|------------------------|-----------------------|----------|----------|----------|----------|----------|
| A (Convex type)        | Fracture strain       | 0.0865   | 0.0864   | 0.0864   | 0.0864   | 0.0864   |
|                        | Fracture energy (MPa) | 23.1466  | 23.1767  | 23.2312  | 23.285   | 23.3745  |
| B (Linear type)        | Fracture strain       | 0.0865   | 0.0864   | 0.0864   | 0.0863   | 0.0863   |
|                        | Fracture energy (MPa) | 23.1466  | 23.3787  | 23.6419  | 23.9536  | 24.3282  |
| C (Concave type)       | Fracture strain       | 0.0865   | 0.0864   | 0.0863   | 0.0861   | 0.0859   |
|                        | Fracture energy (MPa) | 23.1466  | 23.7241  | 24.5386  | 25.5082  | 26.8346  |

| <b>6</b> | <b>7</b> | <b>8</b> | <b>9</b> | <b>10</b> |
|----------|----------|----------|----------|-----------|
| 0.0864   | 0.0864   | 0.0863   | 0.0861   | 0.0856    |
| 23.542   | 23.8353  | 24.3869  | 25.4725  | 29.0875   |
| 0.0862   | 0.0861   | 0.086    | 0.0859   | 0.0856    |
| 24.7729  | 25.3573  | 26.1382  | 27.2116  | 29.0875   |
| 0.0858   | 0.0857   | 0.0857   | 0.0856   | 0.0856    |
| 27.8709  | 28.4356  | 28.7647  | 28.9809  | 29.0875   |
